# Supplementary material
Source: bioRxiv or medRxiv preprint supplement (https://medrxiv.org/highwire/filestream/89488/field_highwire_adjunct_files/0/2020.07.13.20152330-1.pdf)
Supplement: Supplementary file [file 2020.07.13.20152330-1.pdf]

**Supplementary Table 1. The duration of isolation facilities at full capacity under different gaps in the number of isolated beds.**

| The gap in the number of isolated beds | Duration of isolation facilities at full capacity |
|----------------------------------------|---------------------------------------------------|
| 0.6                                    | 82.1                                              |
| 0.4                                    | 33.8                                              |
| 0.2                                    | 12.9                                              |
| 0                                      | 0                                                 |

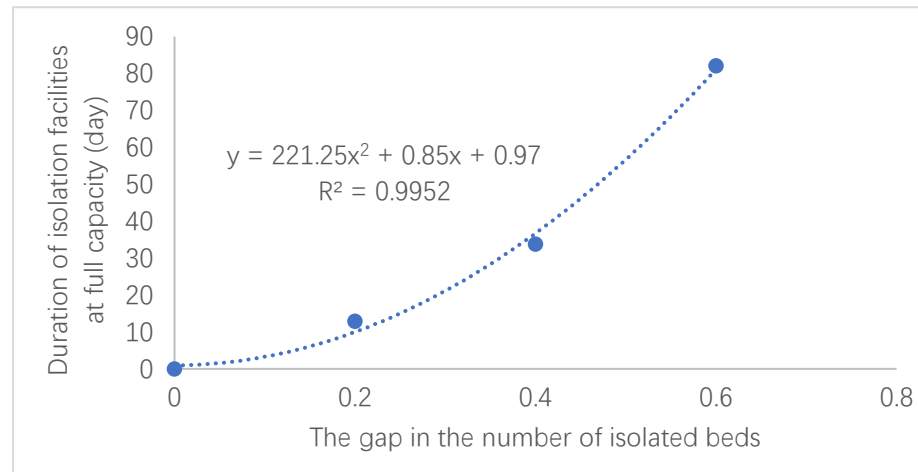

**Supplementary Figure 1. Curves of the duration of isolation facilities at full capacity under different gaps in the number of isolated beds.**

The corresponding date of the peak inpatient number was delayed with the decrease in isolation capacity. The duration of isolation facilities at their full capacity increased with the lack of isolation beds, which showed a quadratic relationship.
